# Supplementary material
Source: Springer Nature journal article supplement (https://www.springermedizin.de/resource/supplementary/12887_2008_231_MOESM5_ESM.pdf/9477584)

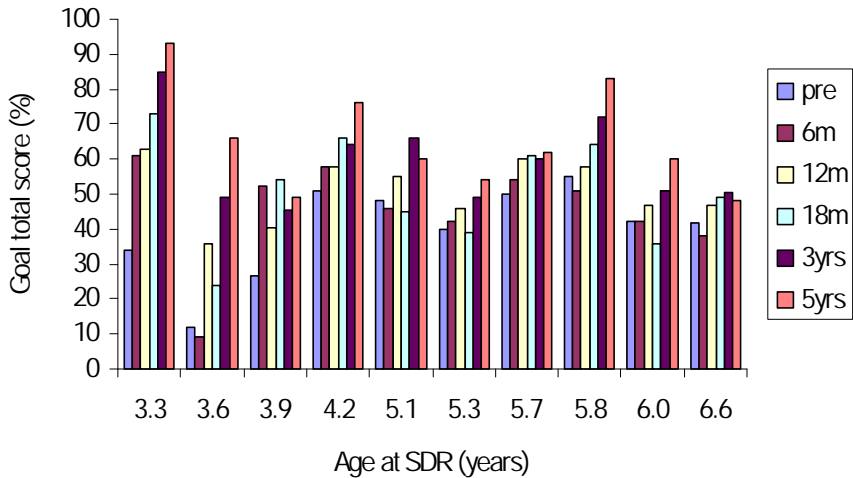

Supplement: MOESM5 [file 9477584]
